# Supplementary figures and images for: Differentiation of Geographic Origin of South African Wines from Austrian Wines by IRMS and SNIF-NMR
Source: MDPI journal article supplement (doi:10.3390/foods12061175), 2023-03-10

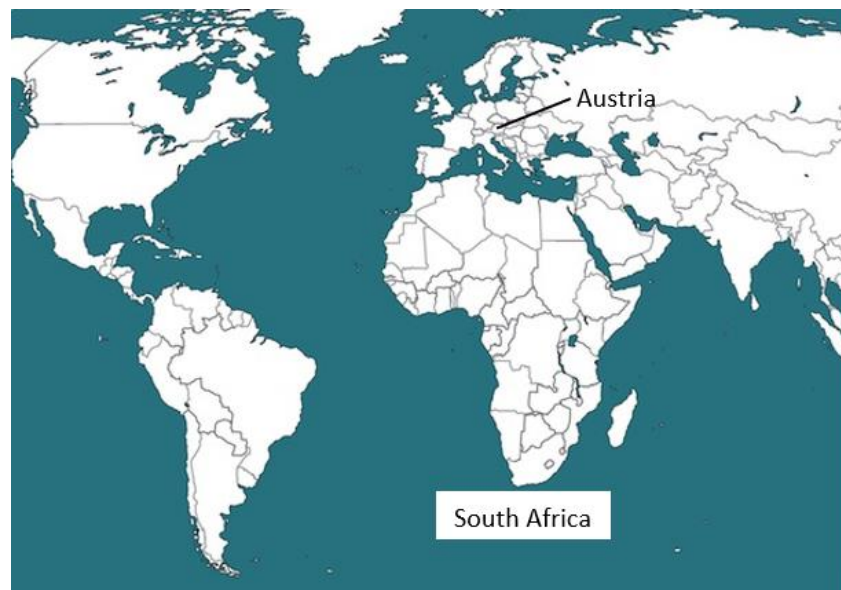

**Figure S1.** Map indicating Austria and South Africa.

Supplement: s1 [file s1]
